# Supplementary material for: Comparative evolutionary genomics of the HADH2 gene encoding Aβ-binding alcohol dehydrogenase/17β-hydroxysteroid dehydrogenase type 10 (ABAD/HSD10)
Source: PubMed Central journal article supplement (PMC1559703; doi:10.1186/1471-2164-7-202), 2006-08-09
Supplement: 1471-2164-7-202-S1.pdf [file 1471-2164-7-202-S1.pdf]

**Additional file 1:** Complex and simple repeats present in HADH2 genes

| Specie              | Intronic location | Repeat class                     | Repeat name                                                                 | Percentage of intronic sequence (%) |
|---------------------|-------------------|----------------------------------|-----------------------------------------------------------------------------|-------------------------------------|
| human               | intron 1          | simple                           | (TAGA) <sub>n</sub>                                                         | 13.42                               |
|                     | intron 2          | LINE<br>SINE                     | L3<br>AluSx (2)                                                             | 55.39                               |
| chimpanzee          | intron 1          | simple                           | (TAGA) <sub>n</sub>                                                         | 16.36                               |
|                     | intron 2          | LINE<br>SINE                     | L3<br>AluSx (2)                                                             | 55.16                               |
| orangutan           | intron 1          | simple                           | (TAGA) <sub>n</sub>                                                         | 12.96                               |
|                     | intron 2          | LINE<br>SINE                     | L3<br>AluSx, AluSq                                                          | 55.14                               |
| rhesus monkey       | intron 1          | simple                           | (TAGA) <sub>n</sub>                                                         | 23.09                               |
|                     | intron 2          | LINE<br>SINE                     | L3<br>AluSx (2)                                                             | 53.83                               |
|                     |                   | simple                           | (CAGGG) <sub>n</sub>                                                        |                                     |
| rat                 | intron 2          | SINE                             | RSINE1, BC1MM                                                               | 24.34                               |
| mouse               | intron 2          | SINE                             | ID4_, RSINE1                                                                | 30.72                               |
|                     |                   | simple                           | (G) <sub>n</sub> , (CA) <sub>n</sub>                                        |                                     |
| cat                 | intron 5          | SINE                             | SINEC_Fc2                                                                   | 48.50                               |
| opossum             | intron 5          | SINE                             | MAR1, MIRb                                                                  | 53.80                               |
|                     |                   | simple                           | (CCCCCA) <sub>n</sub> , (TTGGGTTCCAGT) <sub>n</sub>                         |                                     |
| western clawed frog | intron 3          | unknown                          | TE_ORF_98                                                                   | 21.43                               |
|                     |                   | simple                           | (CACAG) <sub>n</sub>                                                        |                                     |
| zebrafish           | intron 2          | unknown                          | Dr000372, Dr000461, Dr000462, Dr000415, Dr000149, Dr000194                  | 66.29                               |
|                     |                   | DNA transposon                   | TDR18, HATN13_DR, HATN16_DR (2), ANGEL                                      |                                     |
|                     |                   | low complexity<br>simple         | AT_rich (2)<br>(TA) <sub>n</sub>                                            |                                     |
|                     | intron 3          | low complexity                   | AT_rich (3)                                                                 | 9.83                                |
|                     | intron 4          | DNA transposon<br>low complexity | ANGEL<br>AT_rich                                                            | 9.90                                |
| honeybee            | intron 1          | low complexity                   | AT_rich                                                                     | 97.77                               |
|                     | intron 2          | low complexity<br>simple         | AT_rich (2)<br>(TTA) <sub>n</sub> , (TA) <sub>n</sub> , (TTTA) <sub>n</sub> | 87.84                               |
| <i>C. elegans</i>   | intron 2          | DNA transposon                   | CELE1, CELE2 (2)                                                            | 77.40                               |
|                     | intron 4          | DNA transposon                   | CELE2                                                                       | 51.03                               |

NOTE.— In the repeat name column, for repeats found more than once in the same intron, the number of times is indicated in parenthesis
