# Supplementary material for: Comparative evolutionary genomics of the HADH2 gene encoding Aβ-binding alcohol dehydrogenase/17β-hydroxysteroid dehydrogenase type 10 (ABAD/HSD10)
Source: PubMed Central journal article supplement (PMC1559703; doi:10.1186/1471-2164-7-202), 2006-08-09
Supplement: 1471-2164-7-202-S2.pdf [file 1471-2164-7-202-S2.pdf]

**Additional file 2:** Pairwise protein sequence identity of ABAD/HSD10 orthologues

|                    | human | chimpanzee | orangutan | r. monkey | cow  | pig  | dog  | cat  | mouse | rat  | opossum | w. c. frog | a. c. frog | zebrafish | puffer fish | fugu fish | fruitfly | mosquito | honeybee | <i>C. elegans</i> | <i>C. briggsae</i> |  |
|--------------------|-------|------------|-----------|-----------|------|------|------|------|-------|------|---------|------------|------------|-----------|-------------|-----------|----------|----------|----------|-------------------|--------------------|--|
| human              | 1.00  |            |           |           |      |      |      |      |       |      |         |            |            |           |             |           |          |          |          |                   |                    |  |
| chimpanzee         | 1.00  | 1.00       |           |           |      |      |      |      |       |      |         |            |            |           |             |           |          |          |          |                   |                    |  |
| orangutan          | 0.97  | 0.97       | 1.00      |           |      |      |      |      |       |      |         |            |            |           |             |           |          |          |          |                   |                    |  |
| r. monkey          | 0.97  | 0.97       | 0.99      | 1.00      |      |      |      |      |       |      |         |            |            |           |             |           |          |          |          |                   |                    |  |
| cow                | 0.92  | 0.92       | 0.93      | 0.93      | 1.00 |      |      |      |       |      |         |            |            |           |             |           |          |          |          |                   |                    |  |
| pig                | 0.91  | 0.91       | 0.92      | 0.91      | 0.94 | 1.00 |      |      |       |      |         |            |            |           |             |           |          |          |          |                   |                    |  |
| dog                | 0.92  | 0.92       | 0.93      | 0.93      | 0.93 | 0.91 | 1.00 |      |       |      |         |            |            |           |             |           |          |          |          |                   |                    |  |
| cat                | 0.93  | 0.93       | 0.94      | 0.94      | 0.95 | 0.92 | 0.96 | 1.00 |       |      |         |            |            |           |             |           |          |          |          |                   |                    |  |
| mouse              | 0.88  | 0.88       | 0.89      | 0.89      | 0.90 | 0.87 | 0.89 | 0.89 | 1.00  |      |         |            |            |           |             |           |          |          |          |                   |                    |  |
| rat                | 0.88  | 0.88       | 0.89      | 0.90      | 0.90 | 0.87 | 0.89 | 0.89 | 0.93  | 1.00 |         |            |            |           |             |           |          |          |          |                   |                    |  |
| opossum            | 0.73  | 0.73       | 0.74      | 0.74      | 0.74 | 0.73 | 0.74 | 0.74 | 0.73  | 0.72 | 1.00    |            |            |           |             |           |          |          |          |                   |                    |  |
| w. c. frog         | 0.77  | 0.77       | 0.77      | 0.77      | 0.78 | 0.77 | 0.76 | 0.77 | 0.77  | 0.75 | 0.74    | 1.00       |            |           |             |           |          |          |          |                   |                    |  |
| a. c. frog         | 0.76  | 0.76       | 0.76      | 0.76      | 0.77 | 0.75 | 0.75 | 0.76 | 0.75  | 0.73 | 0.74    | 0.96       | 1.00       |           |             |           |          |          |          |                   |                    |  |
| zebrafish          | 0.74  | 0.74       | 0.74      | 0.74      | 0.75 | 0.74 | 0.75 | 0.75 | 0.73  | 0.72 | 0.74    | 0.81       | 0.81       | 1.00      |             |           |          |          |          |                   |                    |  |
| Tetraodon          | 0.73  | 0.73       | 0.74      | 0.73      | 0.74 | 0.73 | 0.74 | 0.75 | 0.74  | 0.73 | 0.73    | 0.79       | 0.78       | 0.86      | 1.00        |           |          |          |          |                   |                    |  |
| Fugu               | 0.75  | 0.75       | 0.76      | 0.75      | 0.77 | 0.75 | 0.76 | 0.77 | 0.74  | 0.73 | 0.75    | 0.81       | 0.80       | 0.90      | 0.95        | 1.00      |          |          |          |                   |                    |  |
| fruitfly           | 0.67  | 0.67       | 0.68      | 0.68      | 0.68 | 0.66 | 0.69 | 0.68 | 0.66  | 0.65 | 0.64    | 0.69       | 0.68       | 0.67      | 0.65        | 0.67      | 1.00     |          |          |                   |                    |  |
| mosquito           | 0.67  | 0.67       | 0.67      | 0.67      | 0.66 | 0.65 | 0.67 | 0.67 | 0.65  | 0.63 | 0.62    | 0.7        | 0.69       | 0.66      | 0.63        | 0.65      | 0.82     | 1.00     |          |                   |                    |  |
| honeybee           | 0.60  | 0.60       | 0.61      | 0.61      | 0.62 | 0.60 | 0.60 | 0.61 | 0.60  | 0.59 | 0.60    | 0.63       | 0.63       | 0.60      | 0.61        | 0.61      | 0.63     | 0.65     | 1.00     |                   |                    |  |
| <i>C. elegans</i>  | 0.59  | 0.59       | 0.59      | 0.61      | 0.59 | 0.57 | 0.57 | 0.57 | 0.59  | 0.59 | 0.53    | 0.57       | 0.57       | 0.57      | 0.57        | 0.57      | 0.57     | 0.56     | 0.55     | 1.00              |                    |  |
| <i>C. briggsae</i> | 0.59  | 0.59       | 0.58      | 0.58      | 0.59 | 0.57 | 0.58 | 0.58 | 0.59  | 0.58 | 0.52    | 0.56       | 0.57       | 0.55      | 0.56        | 0.55      | 0.56     | 0.55     | 0.54     | 0.95              | 1.00               |  |
